# Supplementary material for: Impact and effectiveness of 13-valent pneumococcal conjugate vaccine on population incidence of vaccine and non-vaccine serotype invasive pneumococcal disease in Blantyre, Malawi, 2006–18: prospective observational time-series and case-control studies
Source: PubMed Central journal article supplement (PMC8220129; doi:10.1016/s2214-109x(21)00165-0), 2021-06-15
Supplement: mmc1.pdf [file mmc1.pdf]

# THE LANCET

## Global Health

### Supplementary appendix

This appendix formed part of the original submission and has been peer reviewed. We post it as supplied by the authors.

Supplement to: Bar-Zeev N, Swarthout TD, Everett DB, et al. Impact and effectiveness of 13-valent pneumococcal conjugate vaccine on population incidence of vaccine and non-vaccine serotype invasive pneumococcal disease in Blantyre, Malawi, 2006–18: prospective observational time-series and case-control studies. *Lancet Glob Health* 2021; **9**: e989–98.

**Supplementary Material**  
**Bar-Zeev N, Swarthout TD, et al.**

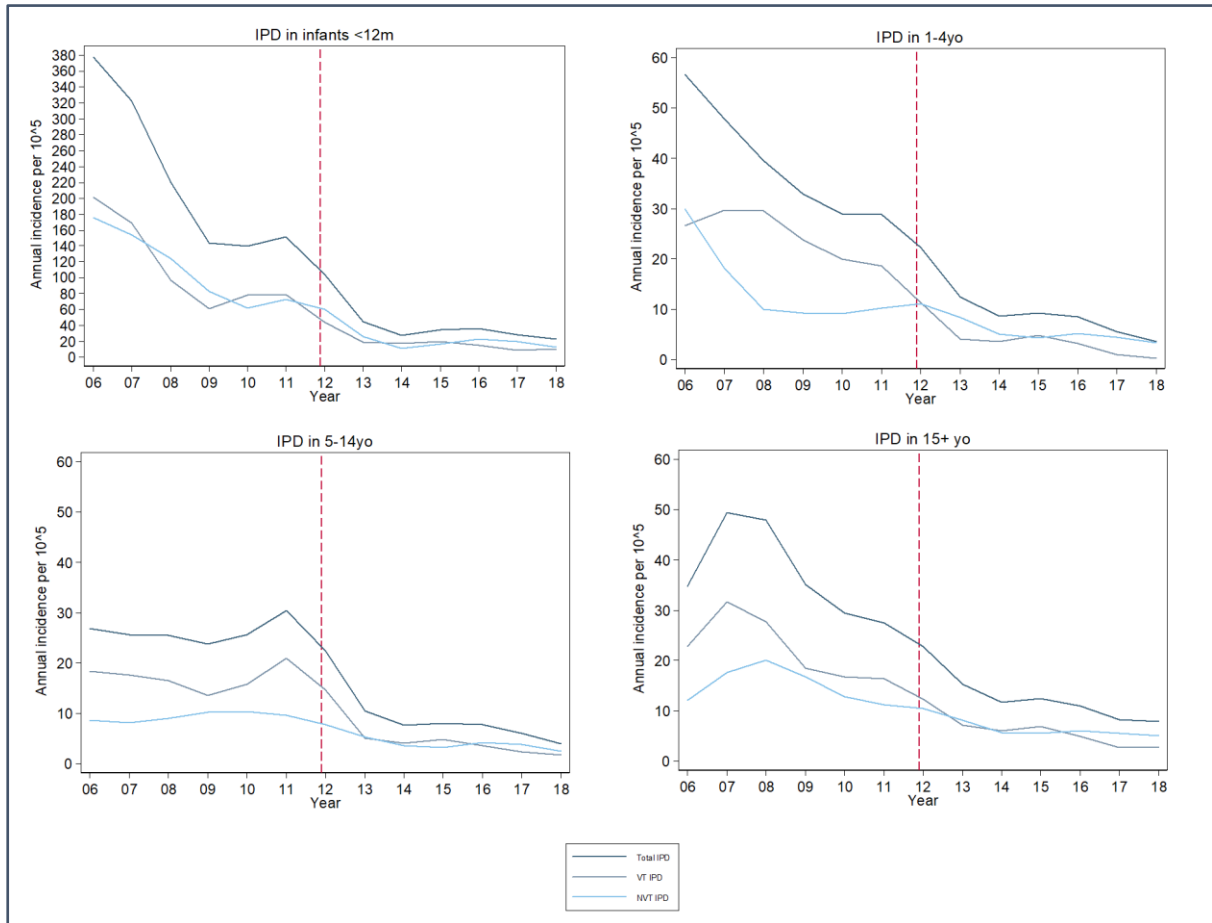

**Supplementary Figure 1.** Three-year moving average smoothed incidence per 100,000 age-specific population of invasive pneumococcal disease (IPD) in Blantyre, Malawi, 1 January 2006 to 31 December 2018. Dashed red line indicates introduction of 13-valent Pneumococcal Conjugate Vaccine. Note: Y-axis in infant panel differs to other panels. IPD = invasive pneumococcal disease; VT = 13-valent vaccine serotypes; NVT = non-13-valent vaccine serotypes.

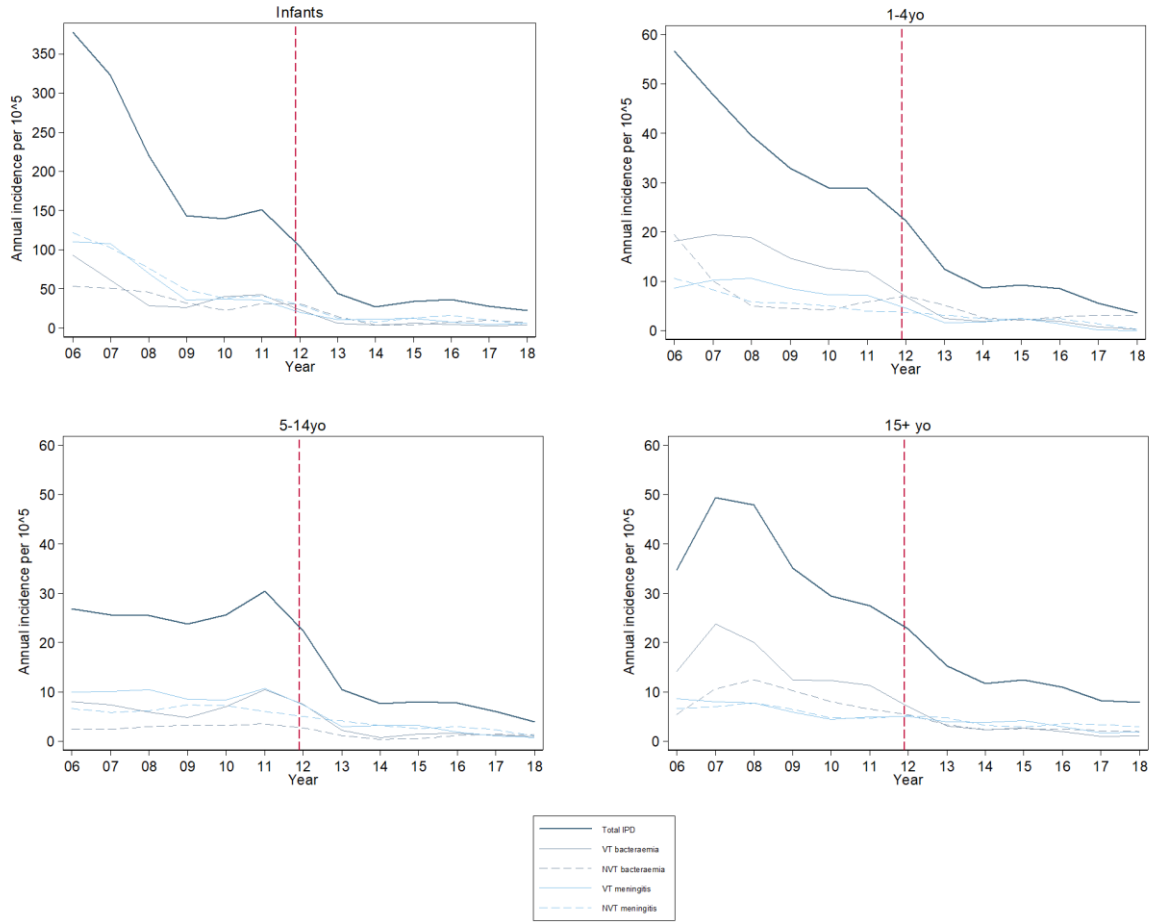

**Supplementary Figure 2.** Three-year moving average smoothed incidence per 100,000 age-specific population of pneumococcal bacteraemia and meningitis, Blantyre, Malawi, January 1 2006 to December 31 2018. Dashed red line indicates introduction of 13-valent Pneumococcal Conjugate Vaccine. IPD = invasive pneumococcal disease; VT = 13-valent vaccine serotypes; NVT = non-13-valent vaccine serotypes.

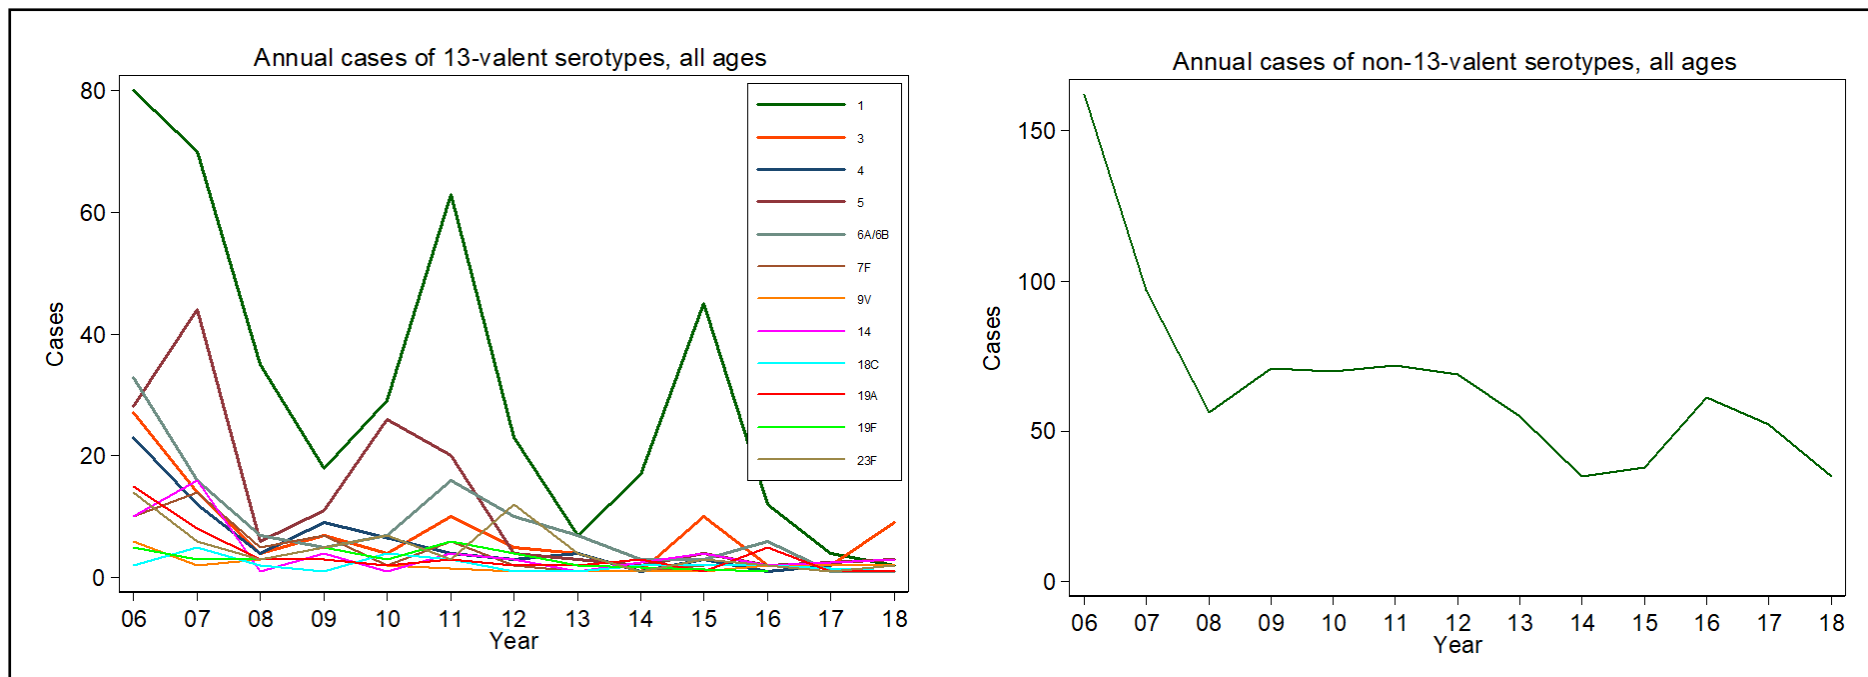

Supplementary Figure 3. Serotype specific cases by year, Blantyre, Malawi, January 1 2006 to December 31 2018.

## Serotyping results, All ages

Supplementary Table 1a. Frequency of serotypes stratified by year

| VT                 | 2006       | 2007       | 2008       | 2009       | 2010       | 2011       | 2012       | 2013      | 2014      | 2015       | 2016      | 2017      | 2018      | Total       |
|--------------------|------------|------------|------------|------------|------------|------------|------------|-----------|-----------|------------|-----------|-----------|-----------|-------------|
| 1                  | 80         | 70         | 35         | 18         | 29         | 63         | 23         | 7         | 17        | 45         | 12        | 4         | 2         | 405         |
| 3                  | 27         | 14         | 4          | 7          | 4          | 10         | 5          | 4         | 1         | 10         | 2         | 2         | 9         | 99          |
| 4                  | 23         | 12         | 4          | 9          | 0          | 4          | 3          | 4         | 1         | 3          | 1         | 2         | 0         | 66          |
| 5                  | 28         | 44         | 6          | 11         | 26         | 20         | 4          | 3         | 2         | 4          | 2         | 0         | 3         | 153         |
| 6A                 | 15         | 5          | 3          | 1          | 2          | 7          | 6          | 3         | 2         | 1          | 4         | 1         | 1         | 51          |
| 6A/6B              | 0          | 0          | 0          | 2          | 2          | 1          | 0          | 1         | 0         | 0          | 0         | 0         | 0         | 6           |
| 6B                 | 18         | 11         | 4          | 2          | 3          | 8          | 4          | 3         | 1         | 2          | 2         | 0         | 0         | 58          |
| 7F                 | 10         | 14         | 5          | 7          | 2          | 6          | 2          | 1         | 1         | 2          | 2         | 2         | 2         | 56          |
| 9V                 | 6          | 2          | 3          | 3          | 2          | 0          | 1          | 1         | 1         | 1          | 2         | 2         | 2         | 26          |
| 14                 | 10         | 16         | 1          | 4          | 1          | 4          | 3          | 1         | 0         | 4          | 2         | 0         | 3         | 49          |
| 18C                | 2          | 5          | 2          | 1          | 4          | 3          | 1          | 1         | 2         | 0          | 2         | 0         | 1         | 24          |
| 19A                | 15         | 8          | 3          | 3          | 2          | 3          | 2          | 2         | 3         | 1          | 5         | 1         | 1         | 49          |
| 19F                | 5          | 3          | 3          | 5          | 3          | 6          | 0          | 2         | 0         | 0          | 1         | 0         | 0         | 28          |
| 23F                | 14         | 6          | 3          | 5          | 7          | 3          | 12         | 4         | 1         | 3          | 2         | 1         | 2         | 63          |
| <b>Total VT</b>    | <b>253</b> | <b>210</b> | <b>76</b>  | <b>78</b>  | <b>87</b>  | <b>138</b> | <b>66</b>  | <b>37</b> | <b>32</b> | <b>76</b>  | <b>39</b> | <b>15</b> | <b>26</b> | <b>1133</b> |
| <b>NVT</b>         | <b>162</b> | <b>97</b>  | <b>56</b>  | <b>71</b>  | <b>70</b>  | <b>72</b>  | <b>69</b>  | <b>55</b> | <b>35</b> | <b>38</b>  | <b>60</b> | <b>52</b> | <b>35</b> | <b>872</b>  |
| <b>Recovered</b>   | <b>415</b> | <b>307</b> | <b>132</b> | <b>149</b> | <b>157</b> | <b>210</b> | <b>135</b> | <b>92</b> | <b>67</b> | <b>114</b> | <b>99</b> | <b>67</b> | <b>61</b> | <b>2005</b> |
| <b>Unrecovered</b> | <b>49</b>  | <b>52</b>  | <b>117</b> | <b>47</b>  | <b>17</b>  | <b>15</b>  | <b>15</b>  | <b>5</b>  | <b>5</b>  | <b>10</b>  | <b>3</b>  | <b>2</b>  | <b>5</b>  | <b>342</b>  |

**Supplementary Table 1b.** Prevalence of VT as portion of VT carriage

| VT    | 2006 | 2007 | 2008 | 2009 | 2010 | 2011 | 2012 | 2013 | 2014 | 2015 | 2016 | 2017 | 2018 | Total |
|-------|------|------|------|------|------|------|------|------|------|------|------|------|------|-------|
| 1     | 31.6 | 33.3 | 46.1 | 23.1 | 33.3 | 45.7 | 34.9 | 18.9 | 53.1 | 59.2 | 30.8 | 26.7 | 7.7  | 35.8  |
| 3     | 10.7 | 6.7  | 5.3  | 9.0  | 4.6  | 7.3  | 7.6  | 10.8 | 3.1  | 13.2 | 5.1  | 13.3 | 34.6 | 8.7   |
| 4     | 9.1  | 5.7  | 5.3  | 11.5 | 0.0  | 2.9  | 4.6  | 10.8 | 3.1  | 4.0  | 2.6  | 13.3 | 0.0  | 5.8   |
| 5     | 11.1 | 21.0 | 7.9  | 14.1 | 29.9 | 14.5 | 6.1  | 8.1  | 6.3  | 5.3  | 5.1  | 0.0  | 11.5 | 13.5  |
| 6A    | 5.9  | 2.4  | 4.0  | 1.3  | 2.3  | 5.1  | 9.1  | 8.1  | 6.3  | 1.3  | 10.3 | 6.7  | 3.9  | 4.5   |
| 6A/6B | 0.0  | 0.0  | 0.0  | 2.6  | 2.3  | 0.7  | 0.0  | 2.7  | 0.0  | 0.0  | 0.0  | 0.0  | 0.0  | 0.5   |
| 6B    | 7.1  | 5.2  | 5.3  | 2.6  | 3.5  | 5.8  | 6.1  | 8.1  | 3.1  | 2.6  | 5.1  | 0.0  | 0.0  | 5.1   |
| 7F    | 4.0  | 6.7  | 6.6  | 9.0  | 2.3  | 4.4  | 3.0  | 2.7  | 3.1  | 2.6  | 5.1  | 13.3 | 7.7  | 4.9   |
| 9V    | 2.4  | 1.0  | 4.0  | 3.9  | 2.3  | 0.0  | 1.5  | 2.7  | 3.1  | 1.3  | 5.1  | 13.3 | 7.7  | 2.3   |
| 14    | 4.0  | 7.6  | 1.3  | 5.1  | 1.2  | 2.9  | 4.6  | 2.7  | 0.0  | 5.3  | 5.1  | 0.0  | 11.5 | 4.3   |
| 18C   | 0.8  | 2.4  | 2.6  | 1.3  | 4.6  | 2.2  | 1.5  | 2.7  | 6.3  | 0.0  | 5.1  | 0.0  | 3.9  | 2.1   |
| 19A   | 5.9  | 3.8  | 4.0  | 3.9  | 2.3  | 2.2  | 3.0  | 5.4  | 9.4  | 1.3  | 12.8 | 6.7  | 3.9  | 4.3   |
| 19F   | 2.0  | 1.4  | 4.0  | 6.4  | 3.5  | 4.4  | 0.0  | 5.4  | 0.0  | 0.0  | 2.6  | 0.0  | 0.0  | 2.5   |
| 23F   | 5.5  | 2.9  | 4.0  | 6.4  | 8.1  | 2.2  | 18.2 | 10.8 | 3.1  | 4.0  | 5.1  | 6.7  | 7.7  | 5.6   |
| Total | 100  | 100  | 100  | 100  | 100  | 100  | 100  | 100  | 100  | 100  | 100  | 100  | 100  | 100   |

**Supplementary Table 1c.** Prevalence of VT as portion of total carriage

| VT       | 2006 | 2007 | 2008 | 2009 | 2010 | 2011 | 2012 | 2013 | 2014 | 2015 | 2016 | 2017 | 2018 | Total |
|----------|------|------|------|------|------|------|------|------|------|------|------|------|------|-------|
| 1        | 19.3 | 22.8 | 26.5 | 12.1 | 18.5 | 30.0 | 17.0 | 7.6  | 25.4 | 39.5 | 12.1 | 6.0  | 3.3  | 20.2  |
| 3        | 6.5  | 4.6  | 3.0  | 4.7  | 2.6  | 4.8  | 3.7  | 4.4  | 1.5  | 8.8  | 2.0  | 3.0  | 14.8 | 4.9   |
| 4        | 5.5  | 3.9  | 3.0  | 6.0  | 0.0  | 1.9  | 2.2  | 4.4  | 1.5  | 2.6  | 1.0  | 3.0  | 0.0  | 3.3   |
| 5        | 6.8  | 14.3 | 4.6  | 7.4  | 16.6 | 9.5  | 3.0  | 3.3  | 3.0  | 3.5  | 2.0  | 0.0  | 4.9  | 7.6   |
| 6A       | 3.6  | 1.6  | 2.3  | 0.7  | 1.3  | 3.3  | 4.4  | 3.3  | 3.0  | 0.9  | 4.0  | 1.5  | 1.6  | 2.5   |
| 6A/6B    | 0.0  | 0.0  | 0.0  | 1.3  | 1.3  | 0.5  | 0.0  | 1.1  | 0.0  | 0.0  | 0.0  | 0.0  | 0.0  | 0.3   |
| 6B       | 4.3  | 3.6  | 3.0  | 1.3  | 1.9  | 3.8  | 3.0  | 3.3  | 1.5  | 1.8  | 2.0  | 0.0  | 0.0  | 2.9   |
| 7F       | 2.4  | 4.6  | 3.8  | 4.7  | 1.3  | 2.9  | 1.5  | 1.1  | 1.5  | 1.8  | 2.0  | 3.0  | 3.3  | 2.8   |
| 9V       | 1.5  | 0.7  | 2.3  | 2.0  | 1.3  | 0.0  | 0.7  | 1.1  | 1.5  | 0.9  | 2.0  | 3.0  | 3.3  | 1.3   |
| 14       | 2.4  | 5.2  | 0.8  | 2.7  | 0.6  | 1.9  | 2.2  | 1.1  | 0.0  | 3.5  | 2.0  | 0.0  | 4.9  | 2.4   |
| 18C      | 0.5  | 1.6  | 1.5  | 0.7  | 2.6  | 1.4  | 0.7  | 1.1  | 3.0  | 0.0  | 2.0  | 0.0  | 1.6  | 1.2   |
| 19A      | 3.6  | 2.6  | 2.3  | 2.0  | 1.3  | 1.4  | 1.5  | 2.2  | 4.5  | 0.9  | 5.1  | 1.5  | 1.6  | 2.4   |
| 19F      | 1.2  | 1.0  | 2.3  | 3.4  | 1.9  | 2.9  | 0.0  | 2.2  | 0.0  | 0.0  | 1.0  | 0.0  | 0.0  | 1.4   |
| 23F      | 3.4  | 2.0  | 2.3  | 3.4  | 4.5  | 1.4  | 8.9  | 4.4  | 1.5  | 2.6  | 2.0  | 1.5  | 3.3  | 3.1   |
| Total VT | 61.0 | 68.4 | 57.6 | 52.3 | 55.4 | 65.7 | 48.9 | 40.2 | 47.8 | 66.7 | 39.4 | 22.4 | 42.6 | 56.5  |

**Supplementary Table 1d.** Prevalence of NVT as portion of total carriage

|     | 2006 | 2007 | 2008 | 2009 | 2010 | 2011 | 2012 | 2013 | 2014 | 2015 | 2016 | 2017 | 2018 | Total |
|-----|------|------|------|------|------|------|------|------|------|------|------|------|------|-------|
| NVT | 39.0 | 31.6 | 42.5 | 47.6 | 44.6 | 34.3 | 51.1 | 59.8 | 52.2 | 33.3 | 60.6 | 77.6 | 57.4 | 43.5  |

## Infants <1yr old

**Supplementary Table 2a.** Frequency of serotypes, stratified by year

| VT          | 2006 | 2007 | 2008 | 2009 | 2010 | 2011 | 2012 | 2013 | 2014 | 2015 | 2016 | 2017 | 2018 | Total |
|-------------|------|------|------|------|------|------|------|------|------|------|------|------|------|-------|
| 1           | 2    | 2    | 0    | 0    | 1    | 1    | 0    | 0    | 1    | 2    | 0    | 0    | 0    | 9     |
| 3           | 2    | 0    | 1    | 0    | 0    | 1    | 0    | 0    | 0    | 3    | 0    | 0    | 0    | 7     |
| 4           | 0    | 1    | 0    | 0    | 0    | 2    | 0    | 0    | 0    | 0    | 0    | 0    | 0    | 3     |
| 5           | 7    | 13   | 0    | 3    | 4    | 7    | 1    | 0    | 1    | 0    | 1    | 0    | 2    | 39    |
| 6A          | 2    | 1    | 0    | 0    | 0    | 1    | 0    | 0    | 1    | 0    | 0    | 0    | 0    | 5     |
| 6B          | 3    | 1    | 1    | 0    | 0    | 2    | 1    | 2    | 0    | 0    | 1    | 0    | 0    | 11    |
| 7F          | 2    | 1    | 0    | 1    | 0    | 1    | 0    | 0    | 0    | 0    | 0    | 0    | 0    | 5     |
| 9V          | 0    | 0    | 0    | 0    | 0    | 0    | 0    | 0    | 0    | 0    | 0    | 0    | 0    | 0     |
| 14          | 0    | 3    | 1    | 0    | 0    | 1    | 0    | 1    | 0    | 0    | 1    | 0    | 1    | 8     |
| 18C         | 1    | 0    | 1    | 0    | 0    | 1    | 0    | 0    | 1    | 0    | 1    | 0    | 0    | 5     |
| 19A         | 1    | 2    | 0    | 0    | 0    | 0    | 0    | 0    | 0    | 0    | 0    | 0    | 0    | 3     |
| 19F         | 2    | 1    | 0    | 0    | 0    | 1    | 0    | 0    | 0    | 0    | 1    | 0    | 0    | 5     |
| 23F         | 2    | 1    | 0    | 0    | 4    | 0    | 3    | 0    | 0    | 0    | 0    | 0    | 1    | 11    |
| Total VT    | 24   | 26   | 4    | 4    | 9    | 18   | 5    | 3    | 4    | 5    | 5    | 0    | 4    | 111   |
| NVT         | 23   | 18   | 8    | 6    | 4    | 17   | 10   | 4    | 1    | 5    | 5    | 8    | 2    | 111   |
| Recovered   | 47   | 44   | 12   | 10   | 13   | 35   | 15   | 7    | 5    | 10   | 10   | 8    | 6    | 222   |
| Unrecovered | 13   | 8    | 12   | 0    | 0    | 2    | 5    | 2    | 1    | 0    | 2    | 0    | 1    | 46    |



**Supplementary Table 2b.** Prevalence of VT as portion of VT carriage, stratified by year

| VT       | 2006 | 2007 | 2008 | 2009 | 2010 | 2011 | 2012 | 2013 | 2014 | 2015 | 2016 | 2017 | 2018 | Total |
|----------|------|------|------|------|------|------|------|------|------|------|------|------|------|-------|
| 1        | 8.3  | 7.7  | 0.0  | 0.0  | 11.1 | 5.6  | 0.0  | 0.0  | 25.0 | 40.0 | 0.0  | 0.0  | 0.0  | 8.1   |
| 3        | 8.3  | 0.0  | 25.0 | 0.0  | 0.0  | 5.6  | 0.0  | 0.0  | 0.0  | 60.0 | 0.0  | 0.0  | 0.0  | 6.3   |
| 4        | 0.0  | 3.8  | 0.0  | 0.0  | 0.0  | 11.1 | 0.0  | 0.0  | 0.0  | 0.0  | 0.0  | 0.0  | 0.0  | 2.7   |
| 5        | 29.2 | 50.0 | 0.0  | 75.0 | 44.4 | 38.9 | 20.0 | 0.0  | 25.0 | 0.0  | 20.0 | 0.0  | 50.0 | 35.1  |
| 6A       | 8.3  | 3.8  | 0.0  | 0.0  | 0.0  | 5.6  | 0.0  | 0.0  | 25.0 | 0.0  | 0.0  | 0.0  | 0.0  | 4.5   |
| 6B       | 12.5 | 3.8  | 25.0 | 0.0  | 0.0  | 11.1 | 20.0 | 66.7 | 0.0  | 0.0  | 20.0 | 0.0  | 0.0  | 9.9   |
| 7F       | 8.3  | 3.8  | 0.0  | 25.0 | 0.0  | 5.6  | 0.0  | 0.0  | 0.0  | 0.0  | 0.0  | 0.0  | 0.0  | 4.5   |
| 9V       | 0.0  | 0.0  | 0.0  | 0.0  | 0.0  | 0.0  | 0.0  | 0.0  | 0.0  | 0.0  | 0.0  | 0.0  | 0.0  | 0.0   |
| 14       | 0.0  | 11.5 | 25.0 | 0.0  | 0.0  | 5.6  | 0.0  | 33.3 | 0.0  | 0.0  | 20.0 | 0.0  | 25.0 | 7.2   |
| 18C      | 4.2  | 0.0  | 25.0 | 0.0  | 0.0  | 5.6  | 0.0  | 0.0  | 25.0 | 0.0  | 20.0 | 0.0  | 0.0  | 4.5   |
| 19A      | 4.2  | 7.7  | 0.0  | 0.0  | 0.0  | 0.0  | 0.0  | 0.0  | 0.0  | 0.0  | 0.0  | 0.0  | 0.0  | 2.7   |
| 19F      | 8.3  | 3.8  | 0.0  | 0.0  | 0.0  | 5.6  | 0.0  | 0.0  | 0.0  | 0.0  | 20.0 | 0.0  | 0.0  | 4.5   |
| 23F      | 8.3  | 3.8  | 0.0  | 0.0  | 44.4 | 0.0  | 60.0 | 0.0  | 0.0  | 0.0  | 0.0  | 0.0  | 25.0 | 9.9   |
| Total VT | 100  | 100  | 100  | 100  | 100  | 100  | 100  | 100  | 100  | 100  | 100  | 0    | 100  | 100   |

**Supplementary Table 2c.** Prevalence of VT as portion of total carriage, stratified by year

| VT       | 2006 | 2007 | 2008 | 2009 | 2010 | 2011 | 2012 | 2013 | 2014 | 2015 | 2016 | 2017 | 2018 | Total |
|----------|------|------|------|------|------|------|------|------|------|------|------|------|------|-------|
| 1        | 4.3  | 4.5  | 0.0  | 0.0  | 7.7  | 2.9  | 0.0  | 0.0  | 20.0 | 20.0 | 0.0  | 0.0  | 0.0  | 4.1   |
| 3        | 4.3  | 0.0  | 8.3  | 0.0  | 0.0  | 2.9  | 0.0  | 0.0  | 0.0  | 30.0 | 0.0  | 0.0  | 0.0  | 3.2   |
| 4        | 0.0  | 2.3  | 0.0  | 0.0  | 0.0  | 5.7  | 0.0  | 0.0  | 0.0  | 0.0  | 0.0  | 0.0  | 0.0  | 1.4   |
| 5        | 14.9 | 29.5 | 0.0  | 30.0 | 30.8 | 20.0 | 6.7  | 0.0  | 20.0 | 0.0  | 10.0 | 0.0  | 33.3 | 17.6  |
| 6A       | 4.3  | 2.3  | 0.0  | 0.0  | 0.0  | 2.9  | 0.0  | 0.0  | 20.0 | 0.0  | 0.0  | 0.0  | 0.0  | 2.3   |
| 6B       | 6.4  | 2.3  | 8.3  | 0.0  | 0.0  | 5.7  | 6.7  | 28.6 | 0.0  | 0.0  | 10.0 | 0.0  | 0.0  | 5.0   |
| 7F       | 4.3  | 2.3  | 0.0  | 10.0 | 0.0  | 2.9  | 0.0  | 0.0  | 0.0  | 0.0  | 0.0  | 0.0  | 0.0  | 2.3   |
| 9V       | 0.0  | 0.0  | 0.0  | 0.0  | 0.0  | 0.0  | 0.0  | 0.0  | 0.0  | 0.0  | 0.0  | 0.0  | 0.0  | 0.0   |
| 14       | 0.0  | 6.8  | 8.3  | 0.0  | 0.0  | 2.9  | 0.0  | 14.3 | 0.0  | 0.0  | 10.0 | 0.0  | 16.7 | 3.6   |
| 18C      | 2.1  | 0.0  | 8.3  | 0.0  | 0.0  | 2.9  | 0.0  | 0.0  | 20.0 | 0.0  | 10.0 | 0.0  | 0.0  | 2.3   |
| 19A      | 2.1  | 4.5  | 0.0  | 0.0  | 0.0  | 0.0  | 0.0  | 0.0  | 0.0  | 0.0  | 0.0  | 0.0  | 0.0  | 1.4   |
| 19F      | 4.3  | 2.3  | 0.0  | 0.0  | 0.0  | 2.9  | 0.0  | 0.0  | 0.0  | 0.0  | 10.0 | 0.0  | 0.0  | 2.3   |
| 23F      | 4.3  | 2.3  | 0.0  | 0.0  | 30.8 | 0.0  | 20.0 | 0.0  | 0.0  | 0.0  | 0.0  | 0.0  | 16.7 | 5.0   |
| Total VT | 51.1 | 59.1 | 33.3 | 40.0 | 69.2 | 51.4 | 33.3 | 42.9 | 80.0 | 50.0 | 50.0 | 0.0  | 66.7 | 50.0  |

**Supplementary Table 2d.** Prevalence of NVT as portion of total carriage, stratified by year

|     | 2006 | 2007 | 2008 | 2009 | 2010 | 2011 | 2012 | 2013 | 2014 | 2015 | 2016 | 2017  | 2018 | Total |
|-----|------|------|------|------|------|------|------|------|------|------|------|-------|------|-------|
| NVT | 48.9 | 40.9 | 66.7 | 60.0 | 30.8 | 48.6 | 66.7 | 57.1 | 20.0 | 50.0 | 50.0 | 100.0 | 33.3 | 100.0 |

### Aged 1-4 years old

**Supplementary Table 3a.** Frequency of serotypes, stratified by year

| VT                 | 2006      | 2007      | 2008      | 2009      | 2010      | 2011      | 2012      | 2013      | 2014     | 2015      | 2016      | 2017     | 2018     | Total      |
|--------------------|-----------|-----------|-----------|-----------|-----------|-----------|-----------|-----------|----------|-----------|-----------|----------|----------|------------|
| 1                  | 1         | 4         | 2         | 2         | 1         | 8         | 1         | 1         | 0        | 4         | 0         | 0        | 0        | 24         |
| 3                  | 1         | 0         | 0         | 0         | 0         | 0         | 0         | 0         | 0        | 1         | 0         | 0        | 0        | 2          |
| 4                  | 0         | 0         | 0         | 0         | 0         | 0         | 0         | 0         | 0        | 0         | 0         | 0        | 0        | 0          |
| 5                  | 1         | 4         | 2         | 1         | 2         | 1         | 0         | 1         | 1        | 1         | 0         | 0        | 0        | 14         |
| 6A                 | 0         | 0         | 1         | 0         | 0         | 2         | 2         | 1         | 0        | 0         | 1         | 0        | 0        | 7          |
| 6A/6B              | 0         | 0         | 0         | 1         | 0         | 1         | 0         | 0         | 0        | 0         | 0         | 0        | 0        | 2          |
| 6B                 | 3         | 0         | 0         | 0         | 2         | 1         | 0         | 0         | 0        | 0         | 0         | 0        | 0        | 6          |
| 7F                 | 1         | 0         | 0         | 1         | 0         | 1         | 0         | 0         | 0        | 0         | 0         | 0        | 0        | 3          |
| 9V                 | 1         | 0         | 0         | 0         | 0         | 0         | 0         | 0         | 0        | 1         | 1         | 0        | 0        | 3          |
| 14                 | 0         | 2         | 0         | 1         | 0         | 0         | 2         | 0         | 0        | 0         | 0         | 0        | 0        | 5          |
| 18C                | 0         | 1         | 0         | 0         | 1         | 1         | 0         | 0         | 0        | 0         | 0         | 0        | 0        | 3          |
| 19A                | 0         | 1         | 0         | 0         | 0         | 0         | 0         | 0         | 0        | 0         | 0         | 0        | 0        | 1          |
| 19F                | 0         | 1         | 0         | 2         | 0         | 1         | 0         | 0         | 0        | 0         | 0         | 0        | 0        | 4          |
| 23F                | 1         | 1         | 1         | 3         | 1         | 0         | 1         | 1         | 1        | 1         | 1         | 1        | 0        | 13         |
| <b>Total</b>       | <b>9</b>  | <b>14</b> | <b>6</b>  | <b>11</b> | <b>7</b>  | <b>16</b> | <b>6</b>  | <b>4</b>  | <b>2</b> | <b>8</b>  | <b>3</b>  | <b>1</b> | <b>0</b> | <b>87</b>  |
| <b>NVT</b>         | <b>15</b> | <b>5</b>  | <b>2</b>  | <b>4</b>  | <b>5</b>  | <b>5</b>  | <b>11</b> | <b>8</b>  | <b>5</b> | <b>3</b>  | <b>8</b>  | <b>4</b> | <b>4</b> | <b>79</b>  |
| <b>Recovered</b>   | <b>24</b> | <b>19</b> | <b>8</b>  | <b>15</b> | <b>12</b> | <b>21</b> | <b>17</b> | <b>12</b> | <b>7</b> | <b>11</b> | <b>11</b> | <b>5</b> | <b>4</b> | <b>166</b> |
| <b>Unrecovered</b> | <b>6</b>  | <b>5</b>  | <b>12</b> | <b>4</b>  | <b>3</b>  | <b>1</b>  | <b>2</b>  | <b>0</b>  | <b>1</b> | <b>1</b>  | <b>1</b>  | <b>1</b> | <b>0</b> | <b>37</b>  |

**Supplementary Table 3b.** Prevalence of VT as portion of VT carriage, stratified by year

| Serotype | 2006 | 2007 | 2008 | 2009 | 2010 | 2011 | 2012 | 2013 | 2014 | 2015 | 2016 | 2017  | 2018 | Total |
|----------|------|------|------|------|------|------|------|------|------|------|------|-------|------|-------|
| 1        | 11.1 | 28.6 | 33.3 | 18.2 | 14.3 | 50.0 | 16.7 | 25.0 | 0.0  | 50.0 | 0.0  | 0.0   | 0.0  | 27.6  |
| 3        | 11.1 | 0.0  | 0.0  | 0.0  | 0.0  | 0.0  | 0.0  | 0.0  | 0.0  | 12.5 | 0.0  | 0.0   | 0.0  | 2.3   |
| 4        | 0.0  | 0.0  | 0.0  | 0.0  | 0.0  | 0.0  | 0.0  | 0.0  | 0.0  | 0.0  | 0.0  | 0.0   | 0.0  | 0.0   |
| 5        | 11.1 | 28.6 | 33.3 | 9.1  | 28.6 | 6.3  | 0.0  | 25.0 | 50.0 | 12.5 | 0.0  | 0.0   | 0.0  | 16.1  |
| 6A       | 0.0  | 0.0  | 16.7 | 0.0  | 0.0  | 12.5 | 33.3 | 25.0 | 0.0  | 0.0  | 33.3 | 0.0   | 0.0  | 8.0   |
| 6A/6B    | 0.0  | 0.0  | 0.0  | 9.1  | 0.0  | 6.3  | 0.0  | 0.0  | 0.0  | 0.0  | 0.0  | 0.0   | 0.0  | 2.3   |
| 6B       | 33.3 | 0.0  | 0.0  | 0.0  | 28.6 | 6.3  | 0.0  | 0.0  | 0.0  | 0.0  | 0.0  | 0.0   | 0.0  | 6.9   |
| 7F       | 11.1 | 0.0  | 0.0  | 9.1  | 0.0  | 6.3  | 0.0  | 0.0  | 0.0  | 0.0  | 0.0  | 0.0   | 0.0  | 3.4   |
| 9V       | 11.1 | 0.0  | 0.0  | 0.0  | 0.0  | 0.0  | 0.0  | 0.0  | 0.0  | 12.5 | 33.3 | 0.0   | 0.0  | 3.4   |
| 14       | 0.0  | 14.3 | 0.0  | 9.1  | 0.0  | 0.0  | 33.3 | 0.0  | 0.0  | 0.0  | 0.0  | 0.0   | 0.0  | 5.7   |
| 18C      | 0.0  | 7.1  | 0.0  | 0.0  | 14.3 | 6.3  | 0.0  | 0.0  | 0.0  | 0.0  | 0.0  | 0.0   | 0.0  | 3.4   |
| 19A      | 0.0  | 7.1  | 0.0  | 0.0  | 0.0  | 0.0  | 0.0  | 0.0  | 0.0  | 0.0  | 0.0  | 0.0   | 0.0  | 1.1   |
| 19F      | 0.0  | 7.1  | 0.0  | 18.2 | 0.0  | 6.3  | 0.0  | 0.0  | 0.0  | 0.0  | 0.0  | 0.0   | 0.0  | 4.6   |
| 23F      | 11.1 | 7.1  | 16.7 | 27.3 | 14.3 | 0.0  | 16.7 | 25.0 | 50.0 | 12.5 | 33.3 | 100.0 | 0.0  | 14.9  |
| Total    | 100  | 100  | 100  | 100  | 100  | 100  | 100  | 100  | 100  | 100  | 100  | 100   | 0    | 100   |

**Supplementary Table 3c.** Prevalence of VT as portion of total carriage, stratified by year

| Serotype | 2006 | 2007 | 2008 | 2009 | 2010 | 2011 | 2012 | 2013 | 2014 | 2015 | 2016 | 2017 | 2018 | Total |
|----------|------|------|------|------|------|------|------|------|------|------|------|------|------|-------|
| 1        | 4.2  | 21.1 | 25.0 | 13.3 | 8.3  | 38.1 | 5.9  | 8.3  | 0.0  | 36.4 | 0.0  | 0.0  | 0.0  | 14.5  |
| 3        | 4.2  | 0.0  | 0.0  | 0.0  | 0.0  | 0.0  | 0.0  | 0.0  | 0.0  | 9.1  | 0.0  | 0.0  | 0.0  | 1.2   |
| 4        | 0.0  | 0.0  | 0.0  | 0.0  | 0.0  | 0.0  | 0.0  | 0.0  | 0.0  | 0.0  | 0.0  | 0.0  | 0.0  | 0.0   |
| 5        | 4.2  | 21.1 | 25.0 | 6.7  | 16.7 | 4.8  | 0.0  | 8.3  | 14.3 | 9.1  | 0.0  | 0.0  | 0.0  | 8.4   |
| 6A       | 0.0  | 0.0  | 12.5 | 0.0  | 0.0  | 9.5  | 11.8 | 8.3  | 0.0  | 0.0  | 9.1  | 0.0  | 0.0  | 4.2   |
| 6A/6B    | 0.0  | 0.0  | 0.0  | 6.7  | 0.0  | 4.8  | 0.0  | 0.0  | 0.0  | 0.0  | 0.0  | 0.0  | 0.0  | 1.2   |
| 6B       | 12.5 | 0.0  | 0.0  | 0.0  | 16.7 | 4.8  | 0.0  | 0.0  | 0.0  | 0.0  | 0.0  | 0.0  | 0.0  | 3.6   |
| 7F       | 4.2  | 0.0  | 0.0  | 6.7  | 0.0  | 4.8  | 0.0  | 0.0  | 0.0  | 0.0  | 0.0  | 0.0  | 0.0  | 1.8   |
| 9V       | 4.2  | 0.0  | 0.0  | 0.0  | 0.0  | 0.0  | 0.0  | 0.0  | 0.0  | 9.1  | 9.1  | 0.0  | 0.0  | 1.8   |
| 14       | 0.0  | 10.5 | 0.0  | 6.7  | 0.0  | 0.0  | 11.8 | 0.0  | 0.0  | 0.0  | 0.0  | 0.0  | 0.0  | 3.0   |
| 18C      | 0.0  | 5.3  | 0.0  | 0.0  | 8.3  | 4.8  | 0.0  | 0.0  | 0.0  | 0.0  | 0.0  | 0.0  | 0.0  | 1.8   |
| 19A      | 0.0  | 5.3  | 0.0  | 0.0  | 0.0  | 0.0  | 0.0  | 0.0  | 0.0  | 0.0  | 0.0  | 0.0  | 0.0  | 0.6   |
| 19F      | 0.0  | 5.3  | 0.0  | 13.3 | 0.0  | 4.8  | 0.0  | 0.0  | 0.0  | 0.0  | 0.0  | 0.0  | 0.0  | 2.4   |
| 23F      | 4.2  | 5.3  | 12.5 | 20.0 | 8.3  | 0.0  | 5.9  | 8.3  | 14.3 | 9.1  | 9.1  | 20.0 | 0.0  | 7.8   |
| Total    | 37.5 | 73.7 | 75.0 | 73.3 | 58.3 | 76.2 | 35.3 | 33.3 | 28.6 | 72.7 | 27.3 | 20.0 | 0.0  | 52.4  |

**Supplementary Table 3d.** Prevalence of NVT as portion of total carriage, stratified by year

|     | 2006 | 2007 | 2008 | 2009 | 2010 | 2011 | 2012 | 2013 | 2014 | 2015 | 2016 | 2017 | 2018  | Total |
|-----|------|------|------|------|------|------|------|------|------|------|------|------|-------|-------|
| NVT | 62.5 | 26.3 | 25.0 | 26.7 | 41.7 | 23.8 | 64.7 | 66.7 | 71.4 | 27.3 | 72.7 | 80.0 | 100.0 | 47.6  |

## Aged 5-14 years old

**Supplementary Table 4a.** Frequency of serotypes, stratified by year

| VT                 | 2006      | 2007      | 2008      | 2009      | 2010      | 2011      | 2012      | 2013       | 2014       | 2015      | 2016       | 2017       | 2018     | Total      |
|--------------------|-----------|-----------|-----------|-----------|-----------|-----------|-----------|------------|------------|-----------|------------|------------|----------|------------|
| 1                  | 8         | 7         | 4         | 2         | 7         | 21        | 4         | 0          | 6          | 8         | 4          | 1          | 2        | 74         |
| 3                  | 0.0       | 0.0       | 0.0       | 1         | 0.0       | 3         | 0.0       | 0.0        | 0.0        | 0.0       | 0.0        | 0.0        | 0.0      | 4          |
| 4                  | 3         | 0.0       | 0.0       | 2         | 0.0       | 0.0       | 2         | 0.0        | 1          | 1         | 0.0        | 2          | 0.0      | 11         |
| 5                  | 0.0       | 2         | 0.0       | 0.0       | 4         | 2         | 2         | 1          | 0.0        | 0.0       | 0.0        | 0.0        | 0.0      | 11         |
| 6A                 | 3         | 0.0       | 0.0       | 0.0       | 0.0       | 1         | 2         | 0.0        | 0.0        | 0.0       | 0.0        | 0.0        | 0.0      | 6          |
| 6B                 | 0.0       | 1         | 0.0       | 0.0       | 0.0       | 2         | 1         | 0.0        | 1          | 0.0       | 0.0        | 0.0        | 0.0      | 5          |
| 7F                 | 0.0       | 2         | 1         | 1         | 0.0       | 1         | 1         | 0.0        | 1          | 0.0       | 2          | 2          | 0.0      | 11         |
| 9V                 | 0.0       | 0.0       | 0.0       | 0.0       | 1         | 0.0       | 1         | 0.0        | 1          | 0.0       | 1          | 0.0        | 0.0      | 4          |
| 14                 | 0.0       | 2         | 0.0       | 1         | 0.0       | 1         | 0.0       | 0.0        | 0.0        | 1         | 0.0        | 0.0        | 0.0      | 5          |
| 18C                | 0.0       | 0.0       | 1         | 0.0       | 1         | 0.0       | 1         | 0.0        | 0.0        | 0.0       | 0.0        | 0.0        | 1        | 4          |
| 19A                | 2         | 0.0       | 0.0       | 0.0       | 0.0       | 1         | 1         | 0.0        | 0.0        | 0.0       | 1          | 0.0        | 0.0      | 5          |
| 19F                | 0.0       | 0.0       | 3         | 3         | 1         | 0.0       | 0.0       | 0.0        | 0.0        | 0.0       | 0.0        | 0.0        | 0.0      | 7          |
| 23F                | 2         | 0.0       | 1         | 0.0       | 0.0       | 3         | 3         | 0.0        | 0.0        | 0.0       | 0.0        | 0.0        | 0.0      | 9          |
| <b>Total</b>       | <b>18</b> | <b>14</b> | <b>10</b> | <b>10</b> | <b>14</b> | <b>35</b> | <b>18</b> | <b>1</b>   | <b>10</b>  | <b>10</b> | <b>8</b>   | <b>5</b>   | <b>3</b> | <b>156</b> |
| <b>NVT</b>         | <b>9</b>  | <b>6</b>  | <b>5</b>  | <b>9</b>  | <b>13</b> | <b>12</b> | <b>10</b> | <b>9</b>   | <b>8</b>   | <b>4</b>  | <b>11</b>  | <b>10</b>  | <b>3</b> | <b>109</b> |
| <b>Recovered</b>   | <b>27</b> | <b>20</b> | <b>15</b> | <b>19</b> | <b>27</b> | <b>47</b> | <b>28</b> | <b>10</b>  | <b>18</b>  | <b>14</b> | <b>19</b>  | <b>15</b>  | <b>6</b> | <b>265</b> |
| <b>Unrecovered</b> | <b>5</b>  | <b>5</b>  | <b>21</b> | <b>7</b>  | <b>1</b>  | <b>4</b>  | <b>4</b>  | <b>0.0</b> | <b>0.0</b> | <b>1</b>  | <b>0.0</b> | <b>0.0</b> | <b>1</b> | <b>49</b>  |

**Supplementary Table 4b.** Prevalence of VT as portion of VT carriage, stratified by year

| Serotype     | 2006       | 2007       | 2008       | 2009       | 2010       | 2011       | 2012       | 2013       | 2014       | 2015       | 2016       | 2017       | 2018       | Total      |
|--------------|------------|------------|------------|------------|------------|------------|------------|------------|------------|------------|------------|------------|------------|------------|
| 1            | 44.4       | 50.0       | 40.0       | 20.0       | 50.0       | 60.0       | 22.2       | 0.0        | 60.0       | 80.0       | 50.0       | 20.0       | 66.7       | 47.4       |
| 3            | 0.0        | 0.0        | 0.0        | 10.0       | 0.0        | 8.6        | 0.0        | 0.0        | 0.0        | 0.0        | 0.0        | 0.0        | 0.0        | 2.6        |
| 4            | 16.7       | 0.0        | 0.0        | 20.0       | 0.0        | 0.0        | 11.1       | 0.0        | 10.0       | 10.0       | 0.0        | 40.0       | 0.0        | 7.1        |
| 5            | 0.0        | 14.3       | 0.0        | 0.0        | 28.6       | 5.7        | 11.1       | 100.0      | 0.0        | 0.0        | 0.0        | 0.0        | 0.0        | 7.1        |
| 6A           | 16.7       | 0.0        | 0.0        | 0.0        | 0.0        | 2.9        | 11.1       | 0.0        | 0.0        | 0.0        | 0.0        | 0.0        | 0.0        | 3.8        |
| 6B           | 0.0        | 7.1        | 0.0        | 0.0        | 0.0        | 5.7        | 5.6        | 0.0        | 10.0       | 0.0        | 0.0        | 0.0        | 0.0        | 3.2        |
| 7F           | 0.0        | 14.3       | 10.0       | 10.0       | 0.0        | 2.9        | 5.6        | 0.0        | 10.0       | 0.0        | 25.0       | 40.0       | 0.0        | 7.1        |
| 9V           | 0.0        | 0.0        | 0.0        | 0.0        | 7.1        | 0.0        | 5.6        | 0.0        | 10.0       | 0.0        | 12.5       | 0.0        | 0.0        | 2.6        |
| 14           | 0.0        | 14.3       | 0.0        | 10.0       | 0.0        | 2.9        | 0.0        | 0.0        | 0.0        | 10.0       | 0.0        | 0.0        | 0.0        | 3.2        |
| 18C          | 0.0        | 0.0        | 10.0       | 0.0        | 7.1        | 0.0        | 5.6        | 0.0        | 0.0        | 0.0        | 0.0        | 0.0        | 33.3       | 2.6        |
| 19A          | 11.1       | 0.0        | 0.0        | 0.0        | 0.0        | 2.9        | 5.6        | 0.0        | 0.0        | 0.0        | 12.5       | 0.0        | 0.0        | 3.2        |
| 19F          | 0.0        | 0.0        | 30.0       | 30.0       | 7.1        | 0.0        | 0.0        | 0.0        | 0.0        | 0.0        | 0.0        | 0.0        | 0.0        | 4.5        |
| 23F          | 11.1       | 0.0        | 10.0       | 0.0        | 0.0        | 8.6        | 16.7       | 0.0        | 0.0        | 0.0        | 0.0        | 0.0        | 0.0        | 5.8        |
| <b>Total</b> | <b>100</b> | <b>100</b> | <b>100</b> | <b>100</b> | <b>100</b> | <b>100</b> | <b>100</b> | <b>100</b> | <b>100</b> | <b>100</b> | <b>100</b> | <b>100</b> | <b>100</b> | <b>100</b> |

**Supplementary Table 4c.** Prevalence of VT as portion of total carriage, stratified by year

| Serotype | 2006 | 2007 | 2008 | 2009 | 2010 | 2011 | 2012 | 2013 | 2014 | 2015 | 2016 | 2017 | 2018 | Total |
|----------|------|------|------|------|------|------|------|------|------|------|------|------|------|-------|
| 1        | 29.6 | 35.0 | 26.7 | 10.5 | 25.9 | 44.7 | 14.3 | 0.0  | 33.3 | 57.1 | 21.1 | 6.7  | 33.3 | 27.9  |
| 3        | 0.0  | 0.0  | 0.0  | 5.3  | 0.0  | 6.4  | 0.0  | 0.0  | 0.0  | 0.0  | 0.0  | 0.0  | 0.0  | 1.5   |
| 4        | 11.1 | 0.0  | 0.0  | 10.5 | 0.0  | 0.0  | 7.1  | 0.0  | 5.6  | 7.1  | 0.0  | 13.3 | 0.0  | 4.2   |
| 5        | 0.0  | 10.0 | 0.0  | 0.0  | 14.8 | 4.3  | 7.1  | 10.0 | 0.0  | 0.0  | 0.0  | 0.0  | 0.0  | 4.2   |
| 6A       | 11.1 | 0.0  | 0.0  | 0.0  | 0.0  | 2.1  | 7.1  | 0.0  | 0.0  | 0.0  | 0.0  | 0.0  | 0.0  | 2.3   |
| 6B       | 0.0  | 5.0  | 0.0  | 0.0  | 0.0  | 4.3  | 3.6  | 0.0  | 5.6  | 0.0  | 0.0  | 0.0  | 0.0  | 1.9   |
| 7F       | 0.0  | 10.0 | 6.7  | 5.3  | 0.0  | 2.1  | 3.6  | 0.0  | 5.6  | 0.0  | 10.5 | 13.3 | 0.0  | 4.2   |
| 9V       | 0.0  | 0.0  | 0.0  | 0.0  | 3.7  | 0.0  | 3.6  | 0.0  | 5.6  | 0.0  | 5.3  | 0.0  | 0.0  | 1.5   |
| 14       | 0.0  | 10.0 | 0.0  | 5.3  | 0.0  | 2.1  | 0.0  | 0.0  | 0.0  | 7.1  | 0.0  | 0.0  | 0.0  | 1.9   |
| 18C      | 0.0  | 0.0  | 6.7  | 0.0  | 3.7  | 0.0  | 3.6  | 0.0  | 0.0  | 0.0  | 0.0  | 0.0  | 16.7 | 1.5   |
| 19A      | 7.4  | 0.0  | 0.0  | 0.0  | 0.0  | 2.1  | 3.6  | 0.0  | 0.0  | 0.0  | 5.3  | 0.0  | 0.0  | 1.9   |
| 19F      | 0.0  | 0.0  | 20.0 | 15.8 | 3.7  | 0.0  | 0.0  | 0.0  | 0.0  | 0.0  | 0.0  | 0.0  | 0.0  | 2.6   |
| 23F      | 7.4  | 0.0  | 6.7  | 0.0  | 0.0  | 6.4  | 10.7 | 0.0  | 0.0  | 0.0  | 0.0  | 0.0  | 0.0  | 3.4   |
| Total    | 66.7 | 70.0 | 66.7 | 52.6 | 51.9 | 74.5 | 64.3 | 10.0 | 55.6 | 71.4 | 42.1 | 33.3 | 50.0 | 58.9  |

**Supplementary Table 4d.** Prevalence of NVT as portion of total carriage, stratified by year

|     | 2006 | 2007 | 2008 | 2009 | 2010 | 2011 | 2012 | 2013 | 2014 | 2015 | 2016 | 2017 | 2018 | Total |
|-----|------|------|------|------|------|------|------|------|------|------|------|------|------|-------|
| NVT | 33.3 | 30.0 | 33.3 | 47.4 | 48.1 | 25.5 | 35.7 | 90.0 | 44.4 | 28.6 | 57.9 | 66.7 | 50.0 | 41.1  |



## Aged 15+ years old

**Supplementary Table 5a.** Frequency of serotypes, stratified by year

| VT                 | 2006      | 2007       | 2008      | 2009      | 2010      | 2011      | 2012      | 2013      | 2014      | 2015      | 2016      | 2017      | 2018      | Total      |
|--------------------|-----------|------------|-----------|-----------|-----------|-----------|-----------|-----------|-----------|-----------|-----------|-----------|-----------|------------|
| 1                  | 11        | 47         | 23        | 13        | 14        | 31        | 17        | 6         | 10        | 26        | 8         | 3         | 0         | 209        |
| 3                  | 2         | 12         | 2         | 5         | 4         | 6         | 5         | 4         | 1         | 6         | 2         | 2         | 9         | 60         |
| 4                  | 3         | 6          | 3         | 6         | 0         | 2         | 1         | 4         | 0         | 1         | 1         | 0         | 0         | 27         |
| 5                  | 3         | 19         | 4         | 6         | 14        | 8         | 1         | 1         | 0         | 3         | 0         | 0         | 1         | 60         |
| 6A                 | 0         | 3          | 2         | 1         | 1         | 2         | 1         | 2         | 1         | 1         | 3         | 1         | 1         | 19         |
| 6A/6B              | 0         | 0          | 0         | 1         | 2         | 0         | 0         | 1         | 0         | 0         | 0         | 0         | 0         | 4          |
| 6B                 | 0         | 8          | 1         | 2         | 0         | 3         | 2         | 1         | 0         | 2         | 1         | 0         | 0         | 20         |
| 7F                 | 2         | 6          | 3         | 4         | 2         | 3         | 1         | 1         | 0         | 1         | 0         | 0         | 2         | 25         |
| 9V                 | 0         | 2          | 3         | 1         | 1         | 0         | 0         | 1         | 0         | 0         | 0         | 2         | 2         | 12         |
| 14                 | 1         | 8          | 0         | 1         | 1         | 2         | 0         | 0         | 0         | 3         | 1         | 0         | 2         | 19         |
| 18C                | 0         | 3          | 0         | 1         | 1         | 0         | 0         | 1         | 1         | 0         | 1         | 0         | 0         | 8          |
| 19A                | 2         | 4          | 2         | 3         | 2         | 2         | 1         | 2         | 3         | 1         | 4         | 1         | 1         | 28         |
| 19F                | 0         | 1          | 0         | 0         | 1         | 2         | 0         | 1         | 0         | 0         | 0         | 0         | 0         | 5          |
| 23F                | 3         | 2          | 0         | 1         | 2         | 0         | 5         | 3         | 0         | 1         | 1         | 0         | 1         | 19         |
| <b>Total</b>       | <b>27</b> | <b>121</b> | <b>43</b> | <b>45</b> | <b>45</b> | <b>61</b> | <b>34</b> | <b>28</b> | <b>16</b> | <b>45</b> | <b>22</b> | <b>9</b>  | <b>19</b> | <b>515</b> |
| <b>NVT</b>         | <b>19</b> | <b>54</b>  | <b>39</b> | <b>43</b> | <b>36</b> | <b>32</b> | <b>35</b> | <b>34</b> | <b>19</b> | <b>24</b> | <b>36</b> | <b>29</b> | <b>26</b> | <b>426</b> |
| <b>Recovered</b>   | <b>46</b> | <b>175</b> | <b>82</b> | <b>88</b> | <b>81</b> | <b>93</b> | <b>69</b> | <b>62</b> | <b>35</b> | <b>69</b> | <b>58</b> | <b>38</b> | <b>45</b> | <b>941</b> |
| <b>Unrecovered</b> | <b>6</b>  | <b>27</b>  | <b>57</b> | <b>31</b> | <b>11</b> | <b>6</b>  | <b>3</b>  | <b>3</b>  | <b>3</b>  | <b>6</b>  | <b>0</b>  | <b>0</b>  | <b>3</b>  | <b>156</b> |

**Supplementary Table 5b.** Prevalence of VT as portion of VT carriage, stratified by year

| Serotype     | 2006       | 2007       | 2008       | 2009       | 2010       | 2011       | 2012       | 2013       | 2014       | 2015       | 2016       | 2017       | 2018       | Total      |
|--------------|------------|------------|------------|------------|------------|------------|------------|------------|------------|------------|------------|------------|------------|------------|
| 1            | 40.7       | 38.8       | 53.5       | 28.9       | 31.1       | 50.8       | 50.0       | 21.4       | 62.5       | 57.8       | 36.4       | 33.3       | 0.0        | 40.6       |
| 3            | 7.4        | 9.9        | 4.7        | 11.1       | 8.9        | 9.8        | 14.7       | 14.3       | 6.3        | 13.3       | 9.1        | 22.2       | 47.4       | 11.7       |
| 4            | 11.1       | 5.0        | 7.0        | 13.3       | 0.0        | 3.3        | 2.9        | 14.3       | 0.0        | 2.2        | 4.5        | 0.0        | 0.0        | 5.2        |
| 5            | 11.1       | 15.7       | 9.3        | 13.3       | 31.1       | 13.1       | 2.9        | 3.6        | 0.0        | 6.7        | 0.0        | 0.0        | 5.3        | 11.7       |
| 6A           | 0.0        | 2.5        | 4.7        | 2.2        | 2.2        | 3.3        | 2.9        | 7.1        | 6.3        | 2.2        | 13.6       | 11.1       | 5.3        | 3.7        |
| 6A/6B        | 0.0        | 0.0        | 0.0        | 2.2        | 4.4        | 0.0        | 0.0        | 3.6        | 0.0        | 0.0        | 0.0        | 0.0        | 0.0        | 0.8        |
| 6B           | 0.0        | 6.6        | 2.3        | 4.4        | 0.0        | 4.9        | 5.9        | 3.6        | 0.0        | 4.4        | 4.5        | 0.0        | 0.0        | 3.9        |
| 7F           | 7.4        | 5.0        | 7.0        | 8.9        | 4.4        | 4.9        | 2.9        | 3.6        | 0.0        | 2.2        | 0.0        | 0.0        | 10.5       | 4.9        |
| 9V           | 0.0        | 1.7        | 7.0        | 2.2        | 2.2        | 0.0        | 0.0        | 3.6        | 0.0        | 0.0        | 0.0        | 22.2       | 10.5       | 2.3        |
| 14           | 3.7        | 6.6        | 0.0        | 2.2        | 2.2        | 3.3        | 0.0        | 0.0        | 0.0        | 6.7        | 4.5        | 0.0        | 10.5       | 3.7        |
| 18C          | 0.0        | 2.5        | 0.0        | 2.2        | 2.2        | 0.0        | 0.0        | 3.6        | 6.3        | 0.0        | 4.5        | 0.0        | 0.0        | 1.6        |
| 19A          | 7.4        | 3.3        | 4.7        | 6.7        | 4.4        | 3.3        | 2.9        | 7.1        | 18.8       | 2.2        | 18.2       | 11.1       | 5.3        | 5.4        |
| 19F          | 0.0        | 0.8        | 0.0        | 0.0        | 2.2        | 3.3        | 0.0        | 3.6        | 0.0        | 0.0        | 0.0        | 0.0        | 0.0        | 1.0        |
| 23F          | 11.1       | 1.7        | 0.0        | 2.2        | 4.4        | 0.0        | 14.7       | 10.7       | 0.0        | 2.2        | 4.5        | 0.0        | 5.3        | 3.7        |
| <b>Total</b> | <b>100</b> | <b>100</b> | <b>100</b> | <b>100</b> | <b>100</b> | <b>100</b> | <b>100</b> | <b>100</b> | <b>100</b> | <b>100</b> | <b>100</b> | <b>100</b> | <b>100</b> | <b>100</b> |

**Supplementary Table 5c.** Prevalence of VT as portion of total carriage, stratified by year

| Serotype     | 2006        | 2007        | 2008        | 2009        | 2010        | 2011        | 2012        | 2013        | 2014        | 2015        | 2016        | 2017        | 2018        | Total       |
|--------------|-------------|-------------|-------------|-------------|-------------|-------------|-------------|-------------|-------------|-------------|-------------|-------------|-------------|-------------|
| 1            | 23.9        | 26.9        | 28.0        | 14.8        | 17.3        | 33.3        | 24.6        | 9.7         | 28.6        | 37.7        | 13.8        | 7.9         | 0.0         | 22.2        |
| 3            | 4.3         | 6.9         | 2.4         | 5.7         | 4.9         | 6.5         | 7.2         | 6.5         | 2.9         | 8.7         | 3.4         | 5.3         | 20.0        | 6.4         |
| 4            | 6.5         | 3.4         | 3.7         | 6.8         | 0.0         | 2.2         | 1.4         | 6.5         | 0.0         | 1.4         | 1.7         | 0.0         | 0.0         | 2.9         |
| 5            | 6.5         | 10.9        | 4.9         | 6.8         | 17.3        | 8.6         | 1.4         | 1.6         | 0.0         | 4.3         | 0.0         | 0.0         | 2.2         | 6.4         |
| 6A           | 0.0         | 1.7         | 2.4         | 1.1         | 1.2         | 2.2         | 1.4         | 3.2         | 2.9         | 1.4         | 5.2         | 2.6         | 2.2         | 2.0         |
| 6A/6B        | 0.0         | 0.0         | 0.0         | 1.1         | 2.5         | 0.0         | 0.0         | 1.6         | 0.0         | 0.0         | 0.0         | 0.0         | 0.0         | 0.4         |
| 6B           | 0.0         | 4.6         | 1.2         | 2.3         | 0.0         | 3.2         | 2.9         | 1.6         | 0.0         | 2.9         | 1.7         | 0.0         | 0.0         | 2.1         |
| 7F           | 4.3         | 3.4         | 3.7         | 4.5         | 2.5         | 3.2         | 1.4         | 1.6         | 0.0         | 1.4         | 0.0         | 0.0         | 4.4         | 2.7         |
| 9V           | 0.0         | 1.1         | 3.7         | 1.1         | 1.2         | 0.0         | 0.0         | 1.6         | 0.0         | 0.0         | 0.0         | 5.3         | 4.4         | 1.3         |
| 14           | 2.2         | 4.6         | 0.0         | 1.1         | 1.2         | 2.2         | 0.0         | 0.0         | 0.0         | 4.3         | 1.7         | 0.0         | 4.4         | 2.0         |
| 18C          | 0.0         | 1.7         | 0.0         | 1.1         | 1.2         | 0.0         | 0.0         | 1.6         | 2.9         | 0.0         | 1.7         | 0.0         | 0.0         | 0.9         |
| 19A          | 4.3         | 2.3         | 2.4         | 3.4         | 2.5         | 2.2         | 1.4         | 3.2         | 8.6         | 1.4         | 6.9         | 2.6         | 2.2         | 3.0         |
| 19F          | 0.0         | 0.6         | 0.0         | 0.0         | 1.2         | 2.2         | 0.0         | 1.6         | 0.0         | 0.0         | 0.0         | 0.0         | 0.0         | 0.5         |
| 23F          | 6.5         | 1.1         | 0.0         | 1.1         | 2.5         | 0.0         | 7.2         | 4.8         | 0.0         | 1.4         | 1.7         | 0.0         | 2.2         | 2.0         |
| <b>Total</b> | <b>58.7</b> | <b>69.1</b> | <b>52.4</b> | <b>51.1</b> | <b>55.6</b> | <b>65.6</b> | <b>49.3</b> | <b>45.2</b> | <b>45.7</b> | <b>65.2</b> | <b>37.9</b> | <b>23.7</b> | <b>42.2</b> | <b>54.7</b> |

**Supplementary Table 5d.** Prevalence of NVT as portion of total carriage, stratified by year

|     | 2006 | 2007 | 2008 | 2009 | 2010 | 2011 | 2012 | 2013 | 2014 | 2015 | 2016 | 2017 | 2018 | Total |
|-----|------|------|------|------|------|------|------|------|------|------|------|------|------|-------|
| NVT | 41.3 | 30.9 | 47.6 | 48.9 | 44.4 | 34.4 | 50.7 | 54.8 | 54.3 | 34.8 | 62.1 | 76.3 | 57.8 | 45.3  |

**Supplementary Table 6.** Frequency of VT- and NVT-IPD stratified by year\*

| year         | Infants    |            |            | 1-4 years old |            |            | 5-14 years old |            |            | 15+ years old<br>Adolescents & adults |            |            | All ages   |            |             |
|--------------|------------|------------|------------|---------------|------------|------------|----------------|------------|------------|---------------------------------------|------------|------------|------------|------------|-------------|
|              | NVT        | VT         | Total      | NVT           | VT         | Total      | NVT            | VT         | Total      | NVT                                   | VT         | Total      | NVT        | VT         | Total       |
| 2006         | 41         | 42         | 83         | 33            | 20         | 53         | 14             | 29         | 43         | 14                                    | 29         | 43         | 102        | 120        | 222         |
| 2007         | 30         | 44         | 74         | 10            | 28         | 38         | 11             | 25         | 36         | 11                                    | 25         | 36         | 62         | 122        | 184         |
| 2008         | 29         | 14         | 43         | 8             | 25         | 33         | 14             | 29         | 43         | 14                                    | 29         | 43         | 65         | 97         | 162         |
| 2009         | 17         | 11         | 28         | 8             | 23         | 31         | 18             | 21         | 39         | 18                                    | 21         | 39         | 61         | 76         | 137         |
| 2010         | 9          | 19         | 28         | 9             | 13         | 22         | 17             | 17         | 34         | 17                                    | 17         | 34         | 52         | 66         | 118         |
| 2011         | 24         | 26         | 50         | 9             | 27         | 36         | 18             | 53         | 71         | 18                                    | 53         | 71         | 69         | 159        | 228         |
| 2012         | 17         | 8          | 25         | 15            | 8          | 23         | 15             | 26         | 41         | 15                                    | 26         | 41         | 62         | 68         | 130         |
| 2013         | 5          | 4          | 9          | 8             | 4          | 12         | 9              | 1          | 10         | 9                                     | 1          | 10         | 31         | 10         | 41          |
| 2014         | 1          | 5          | 6          | 6             | 2          | 8          | 8              | 11         | 19         | 8                                     | 11         | 19         | 23         | 29         | 52          |
| 2015         | 6          | 6          | 12         | 3             | 9          | 12         | 4              | 11         | 15         | 4                                     | 11         | 15         | 17         | 37         | 54          |
| 2016         | 7          | 6          | 13         | 9             | 3          | 12         | 12             | 8          | 20         | 12                                    | 8          | 20         | 40         | 25         | 65          |
| 2017         | 8          | 0          | 8          | 5             | 1          | 6          | 10             | 5          | 15         | 10                                    | 5          | 15         | 33         | 11         | 44          |
| 2018         | 2          | 5          | 7          | 4             | 0          | 4          | 4              | 4          | 8          | 4                                     | 4          | 8          | 14         | 13         | 27          |
| <b>Total</b> | <b>196</b> | <b>190</b> | <b>386</b> | <b>127</b>    | <b>163</b> | <b>290</b> | <b>154</b>     | <b>240</b> | <b>394</b> | <b>154</b>                            | <b>240</b> | <b>394</b> | <b>631</b> | <b>833</b> | <b>1464</b> |

\*VT and NVT corrected for proportion serotyped

**Supplementary Table 7.** Incidence rate ratio of IPD using empirically observed cases and controls, 1 January 2006 to 31 December 2018.

| Serotype | Age group        | 2006–2011 |                        | 2012–2013 |           | 2014–2018 |           | 2014–2018 vs 2006–2011 |            |         |
|----------|------------------|-----------|------------------------|-----------|-----------|-----------|-----------|------------------------|------------|---------|
|          |                  | Cases*    | Incidence <sup>†</sup> | Cases     | Incidence | Cases     | Incidence | IRR <sup>‡</sup>       | 95% CI     | p-value |
| All IPD  | Infants          | 306       | 226.6                  | 34        | 62.0      | 45        | 29.1      | 0.54                   | 0.29, 1.01 | 0.05    |
|          | Children 1–4yrs  | 213       | 39.4                   | 35        | 15.9      | 42        | 6.8       | 0.58                   | 0.30, 1.12 | 0.11    |
|          | Children 5–14yrs | 265       | 27.3                   | 51        | 13.4      | 76        | 6.7       | 0.26                   | 0.12, 0.54 | <0.001  |
|          | Persons ≥15yrs   | 902       | 36.7                   | 178       | 18.8      | 266       | 10.0      | 0.53                   | 0.29, 0.99 | 0.05    |
| VT IPD   | Infants          | 156       | 115.5                  | 12        | 21.9      | 22        | 14.2      | 0.62                   | 0.32, 1.22 | 0.17    |
|          | Children 1–4yrs  | 136       | 25.2                   | 12        | 5.5       | 15        | 2.4       | 0.24                   | 0.10, 0.58 | 0.002   |
|          | Children 5–14yrs | 174       | 17.9                   | 27        | 7.1       | 39        | 3.4       | 0.21                   | 0.08, 0.56 | 0.002   |
|          | Persons ≥15yrs   | 539       | 21.9                   | 85        | 9.0       | 121       | 4.5       | 0.54                   | 0.23, 1.25 | 0.15    |
| NVT IPD  | Infants          | 150       | 111.1                  | 22        | 40.1      | 24        | 15.5      | 0.53                   | 0.23, 1.22 | 0.13    |
|          | Children 1–4yrs  | 77        | 14.3                   | 23        | 10.5      | 27        | 4.4       | 1.78                   | 0.64, 4.96 | 0.27    |
|          | Children 5–14yrs | 92        | 9.5                    | 24        | 6.3       | 38        | 3.4       | 0.31                   | 0.10, 1.00 | 0.05    |
|          | Persons ≥15y     | 363       | 14.8                   | 93        | 9.8       | 145       | 5.4       | 0.50                   | 0.20, 1.26 | 0.14    |

\* Cases of 13VT and non-13VT corrected for proportion serotyped. <sup>†</sup>Incidence per 100,000 age-specific population. <sup>‡</sup> Negative binomial regression of locally weighted incidence, adjusted for year. IPD=Invasive pneumococcal disease; IRR=Incidence Rate Ratio; CI=Confidence interval; 13VT=PCV13-valent vaccine serotypes
